# Supplementary material
Source: publisher figshare collection journal article supplement (https://karger.figshare.com/articles/dataset/_/5124238)
Supplement: Supplementary file 1 [file 1]

# Supplementary Table 2. Raw data for all included CNVs.

A list containing all aberrations included in the comparison analysis of the SNP6.0 and the Cyto2.7M arrays. The sample, chromosomal location and start and stop chromosomal location of the aberrations detected by the two array types was listed. Each aberration was listed as gain or loss corresponding to a CN of the CNV above or below 2, respective, and categorized as *identical* (i), *explainable* (e) or *different* (d).

**Supplementary Table 2. Raw data for all included CNVs.**

|  |  | **CNV and Category** | | **Cyto2.7M** | | **SNP6.0** | |
| --- | --- | --- | --- | --- | --- | --- | --- |
| **# Sample** | **Location** | **Gain** | **Loss** | **Start** | **Stop** | **Start** | **Stop** |
| BB39 | 10q11.22 | d | 0 | 0 | 0 | 47062298 | 47392320 |
| BB39 | 10q11.22 | e | 0 | 0 | 0 | 48730685 | 49287591 |
| BB39 | 14q11.2 | 0 | i | 22606971 | 22975579 | 22572502 | 22960820 |
| BB39 | 17q21.31 | 0 | e | 0 | 0 | 44394399 | 44752288 |
| BB39 | 1p36.13 | e | 0 | 0 | 0 | 16926135 | 17182425 |
| BB39 | 8p23.1 | e | 0 | 0 | 0 | 7170476 | 7787673 |
| H285 | 14q12 | 0 | d | 0 | 0 | 31610838 | 31838843 |
| H285 | 15q15.1 | i | 0 | 42160031 | 42435559 | 42138455 | 42388106 |
| H285 | 17p11.2-q25.3 | i | 0 | 19141697 | 78865490 | 19149273 | 78865490 |
| H285 | 17p13.3-p11.2 | 0 | i | 421754 | 18980307 | 421754 | 19093548 |
| H285 | 19p13.11 | 0 | i | 18446404 | 19303954 | 18042324 | 19301106 |
| H285 | 1p36.11 | 0 | i | 24884491 | 27786517 | 24897302 | 27797207 |
| H285 | 1p36.21 | 0 | e | 0 | 0 | 12882984 | 13181522 |
| H285 | 22q11.22 | 0 | i | 22309412 | 23207076 | 22331459 | 23002699 |
| H285 | 2q13-q31.1 | 0 | i | 1,14E+08 | 1,7E+08 | 113529182 | 170382457 |
| H285 | 3p12.2-p12.1 | 0 | i | 82247330 | 84211104 | 82247294 | 84211111 |
| H285 | 3p13-p12.2 | 0 | i | 70981446 | 81590241 | 71052375 | 81582991 |
| H285 | 3p14.1 | 0 | i | 64884079 | 65334341 | 64883588 | 65324518 |
| H285 | 3p24.2-p22.2 | 0 | i | 24575245 | 38641774 | 24553839 | 38648821 |
| H285 | 3p24.3-p24.2 | 0 | i | 17471715 | 24358906 | 17473056 | 24354515 |
| H285 | 3p25.1-p24.3 | 0 | i | 16262542 | 16745977 | 16248381 | 16744285 |
| H285 | 3p26.3-p25.1 | 0 | i | 426040 | 15004370 | 427634 | 14996063 |
| H285 | 4p15.31 | 0 | e | 19709078 | 20033998 | 0 | 0 |
| H285 | 5p15.33-q35.3 | i | 0 | 1695148 | 1,79E+08 | 1695148 | 178516482 |
| H285 | 6p11.2 | 0 | i | 57606519 | 57809086 | 57553390 | 58001569 |
| H285 | 6p22.2 | d | 0 | 26653052 | 26942251 | 0 | 0 |
| H285 | 6p22.3 | 0 | i | 20314804 | 24832458 | 20314219 | 24824905 |
| H285 | 6p25.3-p24.3 | 0 | i | 478924 | 10531605 | 478924 | 10530992 |
| H285 | 6q11.1-q27 | 0 | i | 62242118 | 1,68E+08 | 62242118 | 167770736 |
| H285 | 7q11.21 | 0 | d | 0 | 0 | 65269822 | 65503833 |
| H285 | 7q11.23 | 0 | d | 0 | 0 | 74073294 | 74531569 |
| H285 | 7q21.12 | 0 | i | 86567953 | 86845000 | 86582890 | 86838068 |
| H285 | 7q36.3 | d | 0 | 1,56E+08 | 1,56E+08 | 0 | 0 |
| H296 | 10p15.3-p11.22 | i | 0 | 747114 | 33164673 | 747114 | 33154083 |
| H296 | 10q26.3 | d | 0 | 1,33E+08 | 1,34E+08 | 0 | 0 |
| H296 | 11p15.5-q25 | i | 0 | 3632698 | 1,34E+08 | 3632698 | 133677302 |
| H296 | 17p13.3-p12 | 0 | i | 421754 | 15264931 | 421754 | 15266579 |
| H296 | 17q21.31 | e | 0 | 0 | 0 | 44344846 | 44752288 |
| H296 | 18p11.32 | i | 0 | 155563 | 75708208 | 155563 | 75708208 |
| H296 | 18p13.3 | d | 0 | 327736 | 2547241 | 0 | 0 |
| H296 | 19p12 | d | 0 | 22879798 | 23127690 | 0 | 0 |
| H296 | 19p13.2 | i | 0 | 7431333 | 10464746 | 7587299 | 10106671 |
| H296 | 19p13.2 | i | 0 | 10762714 | 12041958 | 10769080 | 12014627 |
| H296 | 19p13.3-p13.2 | 0 | i | 5635563 | 7283875 | 5601374 | 7300043 |
| H296 | 19q13.41 | i | 0 | 52270124 | 52622729 | 52273256 | 52614747 |
| H296 | 1p31.1 | d | 0 | 83657335 | 83908853 | 0 | 0 |
| H296 | 1p36.13 | 0 | i | 17296547 | 18135477 | 17114414 | 18136451 |
| H296 | 1p36.32-1p36.23 | i | 0 | 4174988 | 7437483 | 4171316 | 7434892 |
| H296 | 1q32.1 | 0 | i | 2,02E+08 | 2,03E+08 | 202395248 | 202646263 |
| H296 | 1q41 | 0 | i | 2,21E+08 | 2,21E+08 | 220748831 | 221000965 |
| H296 | 22q11.21 | e | 0 | 0 | 0 | 21567218 | 21917311 |
| H296 | 22q11.22 | e | 0 | 0 | 0 | 22968323 | 23271342 |
| H296 | 2q37.3 | d | 0 | 0 | 0 | 239934793 | 240171191 |
| H296 | 3p12.3 | d | 0 | 75396836 | 75696374 | 0 | 0 |
| H296 | 4p16.1 | e | 0 | 10103461 | 10317543 | 0 | 0 |
| H296 | 6q16.1 | 0 | i | 94363314 | 95030320 | 94362740 | 95027178 |
| H296 | 7p21.3-q11.22 | i | 0 | 9897199 | 67544236 | 9895553 | 67535282 |
| H296 | 7p22.3-p22.1 | i | 0 | 2714334 | 4945455 | 2714334 | 4883121 |
| H296 | 7q11.23 | i | 0 | 72913167 | 1,57E+08 | 72254446 | 157179832 |
| H296 | 8p23.3-q24.3 | i | 0 | 1987720 | 1,42E+08 | 1987720 | 141994802 |
| H296 | 9p24.3-q21.11 | i | 0 | 214864 | 38747262 | 214864 | 38747262 |
| H302 | 15q11.2 | d | 0 | 0 | 0 | 24477793 | 24713413 |
| H302 | 17p13.1 | 0 | i | 7439631 | 7688257 | 7439614 | 7689872 |
| H302 | 17q21.31 | e | 0 | 0 | 0 | 44441469 | 44752288 |
| H302 | 17q22-q25.3 | i | 0 | 52193822 | 78865490 | 52195026 | 78865490 |
| H302 | 1p36.33-p36.23 | 0 | i | 4002832 | 8952024 | 4002832 | 8983048 |
| H302 | 22q11.22 | d | 0 | 0 | 0 | 22627043 | 23223233 |
| H302 | 3p26.3-p12.2 | 0 | i | 90919 | 82268058 | 141116 | 82275581 |
| H302 | 4p11 | 0 | i | 48532145 | 49063478 | 48531766 | 49063478 |
| H302 | 4p11/q11-q21.23 | 0 | i | 52727096 | 85458301 | 52727096 | 85460656 |
| H302 | 4q21.23-q21.3 | 0 | i | 86430150 | 87107937 | 86421813 | 87108555 |
| H302 | 4q22.1 | i | 0 | 88461635 | 91390961 | 88461901 | 91380045 |
| H302 | 4q24-q35.2 | 0 | i | 1,05E+08 | 1,9E+08 | 104770874 | 190432838 |
| H302 | 6q12 | 0 | i | 64310098 | 64557043 | 64312013 | 64556918 |
| H302 | 6q14.1-q25.2 | 0 | i | 79814481 | 1,53E+08 | 79780858 | 152657496 |
| H302 | 7q35 | e | 0 | 0 | 0 | 143218395 | 143547260 |
| H321 | 18q11.1-q23 | i | 0 | 18560354 | 75708208 | 18560354 | 75708208 |
| H321 | 19p13.12 | d | 0 | 14802813 | 15141551 | 0 | 0 |
| H321 | 19p13.2 | d | 0 | 12241044 | 12687876 | 0 | 0 |
| H321 | 19p13.2 | 0 | d | 0 | 0 | 10754399 | 11194823 |
| H321 | 2q22.3 | 0 | e | 1,45E+08 | 1,46E+08 | 0 | 0 |
| H321 | 3p22.3 | 0 | e | 0 | 0 | 32129314 | 32420354 |
| H321 | 6q12-q21 | 0 | i | 63746876 | 1,07E+08 | 63742028 | 106772773 |
| H321 | 9p21.3 | 0 | d | 24264289 | 24608711 | 0 | 0 |
| H321 | 9p22.1-p21.3 | 0 | i | 19480125 | 22560364 | 19555582 | 22037357 |
| H35 | 10q22.1 | e | 0 | 0 | 0 | 72127497 | 72336275 |
| H35 | 10q26.3 | d | 0 | 1,33E+08 | 1,34E+08 | 0 | 0 |
| H35 | 13q13.1 | 0 | i | 33009991 | 33868374 | 32999846 | 33868168 |
| H35 | 13q13.3 | 0 | i | 37639217 | 38114245 | 37703857 | 38113615 |
| H35 | 13q14.11 | 0 | i | 41229153 | 41458327 | 41226664 | 41460914 |
| H35 | 15q11.1/q11.2-q21.3 | 0 | i | 23705544 | 55407252 | 23705544 | 55408307 |
| H35 | 16q12.1 | 0 | i | 48750847 | 50373581 | 48729382 | 50378507 |
| H35 | 16q21 | 0 | i | 60868057 | 63951089 | 60922504 | 63951177 |
| H35 | 17p13.3-q11.2 | 0 | i | 439982 | 29587799 | 421754 | 29582052 |
| H35 | 18p11.32 | 0 | i | 368114 | 654620 | 367106 | 656020 |
| H35 | 18q12.2 | 0 | i | 36651960 | 37065913 | 36656751 | 37059615 |
| H35 | 18q21.32 | 0 | i | 58444044 | 58901411 | 58441134 | 58903156 |
| H35 | 18q23 | 0 | i | 65979558 | 75708208 | 65978112 | 75708208 |
| H35 | 1p13.2-p13.1 | 0 | i | 1,16E+08 | 1,17E+08 | 115994786 | 117293778 |
| H35 | 1p21.1 | 0 | i | 1,05E+08 | 1,06E+08 | 104810435 | 105692688 |
| H35 | 1p35.2 | 0 | i | 31393887 | 31657900 | 31172047 | 31625334 |
| H35 | 1p36.12 | 0 | i | 22511274 | 22853589 | 22507422 | 22914284 |
| H35 | 1p36.32/33-p36.22 | 0 | i | 4002832 | 9746020 | 4002832 | 9811435 |
| H35 | 1q21.3-q42.3 | i | 0 | 1,51E+08 | 2,49E+08 | 151088166 | 248562278 |
| H35 | 20q11.22 | 0 | i | 32814035 | 33337846 | 32815820 | 33483742 |
| H35 | 22q11.22 | e | 0 | 0 | 0 | 22997798 | 23262969 |
| H35 | 22q13.2 | d | 0 | 43495059 | 43771959 | 0 | 0 |
| H35 | 22q13.31-q13.33 | 0 | i | 45787314 | 50288344 | 45779169 | 50288344 |
| H35 | 2p25.1 | d | 0 | 10400503 | 10602678 | 0 | 0 |
| H35 | 2p25.3 | d | 0 | 0 | 0 | 3883126 | 4119306 |
| H35 | 2q13 | e | 0 | 1,14E+08 | 1,14E+08 | 0 | 0 |
| H35 | 2q32.1 | 0 | i | 1,88E+08 | 1,88E+08 | 187503196 | 187743228 |
| H35 | 2q36.1-q37.3 | i | 0 | 2,24E+08 | 2,43E+08 | 223304388 | 242686732 |
| H35 | 3p12.2-p11.1 | i | 0 | 84835950 | 90276660 | 84789061 | 90276660 |
| H35 | 3p26.3-p12.2 | i | 0 | 90919 | 82889182 | 90919 | 82940159 |
| H35 | 3q11.2-q13.12 | 0 | i | 96232056 | 1,07E+08 | 96240793 | 107372177 |
| H35 | 3q13.2-q21.2 | 0 | i | 1,13E+08 | 1,25E+08 | 113171933 | 124841013 |
| H35 | 4p12-p11 | 0 | i | 47088605 | 48567916 | 47088488 | 48554937 |
| H35 | 4p15.11-p14 | 0 | i | 35471133 | 35801251 | 35511132 | 35806474 |
| H35 | 4q22.3-q28.1 | i | 0 | 98636198 | 1,27E+08 | 98663834 | 126596324 |
| H35 | 4q28.1 | 0 | i | 1,27E+08 | 1,27E+08 | 126598110 | 127191240 |
| H35 | 4q28.1-q34.1 | i | 0 | 1,27E+08 | 1,72E+08 | 127193856 | 172308920 |
| H35 | 4q34.1-q35.2 | 0 | i | 1,72E+08 | 1,89E+08 | 172418898 | 189213163 |
| H35 | 4q35.2 | i | 0 | 1,89E+08 | 1,9E+08 | 189214502 | 190432838 |
| H35 | 5q13.2 | e | 0 | 0 | 0 | 69074964 | 70178835 |
| H35 | 6p21.2 | 0 | e | 0 | 0 | 38793402 | 39354522 |
| H35 | 6p21.32 | 0 | i | 32310395 | 32714599 | 32518756 | 32719381 |
| H35 | 6p25.3-p22.3 | 0 | i | 505187 | 23936787 | 478924 | 23935913 |
| H35 | 6q12 | 0 | i | 67350594 | 67641067 | 67338216 | 67612573 |
| H35 | 6q14.1-q15 | i | 0 | 75913738 | 91742991 | 75917164 | 91756206 |
| H35 | 6q15-q27 | 0 | i | 91756205 | 1,68E+08 | 91756460 | 167770736 |
| H35 | 7p12.3-q11.21/p11.2 | 0 | i | 46438165 | 56743520 | 46424610 | 56743520 |
| H35 | 8p23.1 | e | 0 | 0 | 0 | 7170476 | 7832042 |
| H35 | 8p23.1 | e | 0 | 0 | 0 | 12260914 | 12558917 |
| H35 | 8q12.3 | 0 | i | 63010960 | 64429663 | 63010262 | 64412986 |
| H35 | 8q22.1 | 0 | i | 94922591 | 95190955 | 94923943 | 95196415 |
| H35 (*) | 17q21.31 | d | 0 | 44112142 | 44787390 | 44401054 | 44752288 |
| H378 | 10q11.22 | i | 0 | 46776777 | 47380066 | 46527664 | 47392320 |
| H378 | 10q22.3 | 0 | i | 79048763 | 79446497 | 79091886 | 79450865 |
| H378 | 10q23.2-q23.31 | 0 | i | 89260408 | 90903281 | 89262581 | 90898254 |
| H378 | 10q26.11 | 0 | i | 1,21E+08 | 1,21E+08 | 120835938 | 121269224 |
| H378 | 11q13.4 | i | 0 | 72546122 | 80405623 | 72542254 | 80405229 |
| H378 | 11q14.1 | 0 | i | 82549619 | 82868561 | 82549795 | 82847802 |
| H378 | 11q14.1-q21 | 0 | i | 83457981 | 94931210 | 83467746 | 94931583 |
| H378 | 11q21 | i | 0 | 94932434 | 95879654 | 94933891 | 95878084 |
| H378 | 11q21-q25 | i | 0 | 96083885 | 1,34E+08 | 96077771 | 133677302 |
| H378 | 13q14.11-q31.1 | 0 | i | 45057278 | 84552993 | 45065126 | 84553464 |
| H378 | 15q25.2 | e | 0 | 0 | 0 | 84821960 | 85089609 |
| H378 | 15q26.2-q26.3 | 0 | i | 98484951 | 98771400 | 98493875 | 98776252 |
| H378 | 16q22.2-q22.3 | 0 | i | 72303089 | 73144224 | 72301478 | 73146061 |
| H378 | 16q24.1 | i | 0 | 85840074 | 86067533 | 85832291 | 86106010 |
| H378 | 17p13.2-p12 | 0 | i | 3343722 | 11252223 | 3347590 | 11027508 |
| H378 | 17q21.31-p12 | e | 0 | 0 | 0 | 44157474 | 44364158 |
| H378 | 19p13.2 | 0 | i | 12295581 | 13002505 | 12296283 | 13001485 |
| H378 | 19p13.3 | 0 | i | 4188692 | 4434574 | 4188692 | 4425814 |
| H378 | 19q13.33-q13.43 | i | 0 | 49352517 | 58850756 | 49358159 | 58850756 |
| H378 | 1p21.2-p12 | 0 | i | 1,01E+08 | 1,2E+08 | 101090550 | 119751175 |
| H378 | 1p32.3 | 0 | d | 51019219 | 51219287 | 0 | 0 |
| H378 | 1p32.3 | 0 | d | 51507259 | 51733101 | 0 | 0 |
| H378 | 1p33 | 0 | i | 50251488 | 50451507 | 50335527 | 50623969 |
| H378 | 1p36.11-p34.3 | 0 | i | 27783728 | 36498268 | 27835596 | 36425400 |
| H378 | 22q11.22 | d | 0 | 0 | 0 | 22666544 | 23190522 |
| H378 | 22q11.23-q12.1 | i | 0 | 25662678 | 25924437 | 25663972 | 25918709 |
| H378 | 2p11.2 | i | 0 | 87364076 | 87996383 | 87250483 | 88024655 |
| H378 | 2q13 | d | 0 | 1,12E+08 | 1,12E+08 | 0 | 0 |
| H378 | 2q36.1 | 0 | i | 2,22E+08 | 2,22E+08 | 221657679 | 221978841 |
| H378 | 2q36.3-q37.1 | 0 | i | 2,31E+08 | 2,32E+08 | 230641611 | 231915023 |
| H378 | 2q37.3 | 0 | i | 2,37E+08 | 2,38E+08 | 237410657 | 237720634 |
| H378 | 2q37.3 | 0 | i | 2,42E+08 | 2,43E+08 | 242391792 | 242686732 |
| H378 | 3p26.3 | i | 0 | 90919 | 1,88E+08 | 90919 | 187525117 |
| H378 | 3q27.3-q28 | 0 | i | 1,88E+08 | 1,88E+08 | 187527762 | 188215487 |
| H378 | 3q28-q29 | i | 0 | 1,88E+08 | 1,98E+08 | 188222317 | 197581146 |
| H378 | 4p12 | 0 | i | 46260309 | 47351834 | 46241410 | 47350872 |
| H378 | 4q13.1 | 0 | i | 60730019 | 61104674 | 60737370 | 61104288 |
| H378 | 5p15.2 | 0 | i | 10970799 | 12433940 | 10982948 | 12430091 |
| H378 | 5q11.1-q12.3 | 0 | i | 49564628 | 64104142 | 49564628 | 64102774 |
| H378 | 5q14.3 | 0 | i | 87953960 | 88660394 | 87951966 | 88653973 |
| H378 | 5q31.3-q33.2 | 0 | i | 1,43E+08 | 1,55E+08 | 143324285 | 155106389 |
| H378 | 6p12.2 | 0 | i | 52228622 | 52568342 | 52219954 | 52583493 |
| H378 | 6p21.33-p21.32 | 0 | i | 30618230 | 32953711 | 30601820 | 32943345 |
| H378 | 6q12 | 0 | i | 66471387 | 66901412 | 66471879 | 66904407 |
| H378 | 6q12-q27 | 0 | i | 68505769 | 1,68E+08 | 68505159 | 167770736 |
| H378 | 8q12.1-q12.2 | 0 | i | 57300972 | 62041697 | 57299547 | 62039202 |
| H378 | 9p21.3 | 0 | e | 21830361 | 22048363 | 0 | 0 |
| H378 | 9p22.2-p22.1 | 0 | i | 17616165 | 19052503 | 17620243 | 19037750 |
| H378 | 9q21.13-q21.32 | 0 | i | 76105466 | 86088061 | 76113082 | 86079639 |
| H378 | 9q21.32-q31.1 | 0 | i | 86648649 | 1,07E+08 | 86657056 | 106851846 |
| H378 | 9q33.1 | 0 | i | 1,2E+08 | 1,2E+08 | 120287707 | 120494821 |
| H380 | 10q11.22 | d | 0 | 0 | 0 | 46943376 | 47392320 |
| H380 | 10q11.22 | d | 0 | 0 | 0 | 48771937 | 49287591 |
| H380 | 10q24.1 | 0 | i | 97791298 | 98775121 | 97780769 | 98774911 |
| H380 | 16q11.2-q12.1 | i | 0 | 46783988 | 47021442 | 46783988 | 47021827 |
| H380 | 16q12.1 | 0 | i | 47023940 | 51103240 | 47022777 | 51098427 |
| H380 | 16q12.2-q12.2 | i | 0 | 51150475 | 55842324 | 51164408 | 55821957 |
| H380 | 16q12.2-q21 | 0 | i | 55916852 | 58382735 | 55909269 | 58390831 |
| H380 | 16q21 | i | 0 | 64192168 | 64525859 | 64178830 | 64520195 |
| H380 | 16q22.1 | i | 0 | 66976838 | 70704269 | 66975049 | 70708698 |
| H380 | 16q22.1/22.2-q23.2 | 0 | i | 70749838 | 81461322 | 71027688 | 81459415 |
| H380 | 16q24.1/q23.2-q24.1 | i | 0 | 81465256 | 85819691 | 81466540 | 85819521 |
| H380 | 17p13.2/13.3-p11.1 | 0 | i | 421754 | 22163680 | 421754 | 22163680 |
| H380 | 17q11.1-q24.2 | i | 0 | 25342682 | 64659325 | 25324882 | 64668940 |
| H380 | 18p11.32-q21.33 | i | 0 | 155563 | 60786490 | 155563 | 60789486 |
| H380 | 1p35.2-135.1 | 0 | i | 30899959 | 33157888 | 30917163 | 33166935 |
| H380 | 1p36.13 | e | 0 | 0 | 0 | 16844919 | 17190850 |
| H380 | 22q11.1-q11.21 | 0 | i | 17206628 | 18213057 | 17206628 | 18279041 |
| H380 | 22q11.22 | e | 0 | 0 | 0 | 22997798 | 23223233 |
| H380 | 22q13.1-q13.2 | 0 | i | 39902524 | 41717044 | 39904647 | 41744840 |
| H380 | 3p12.3 | 0 | d | 75427657 | 75635516 | 0 | 0 |
| H380 | 4p16.3-q35.2 | 0 | i | 1683192 | 1,9E+08 | 1683192 | 190432838 |
| H380 | 5q13.2 | e | 0 | 0 | 0 | 69074964 | 70178835 |
| H380 | 5q14.3-q21.3 | 0 | i | 82839781 | 1,08E+08 | 82840175 | 108250462 |
| H380 | 8p23.3-q24.3 | i | 0 | 1987720 | 1,42E+08 | 1987720 | 141994802 |
| H380 | 9q31.3-q32 | 0 | i | 1,15E+08 | 1,15E+08 | 114739338 | 115252995 |
| H385 | 10q21.2-q21.3 | 0 | i | 63818082 | 65460084 | 63817403 | 65450635 |
| H385 | 17p13.1 | 0 | i | 7456928 | 7690560 | 7439614 | 7689872 |
| H385 | 17q21.33-q22 | i | 0 | 49612199 | 54135255 | 49699055 | 54149399 |
| H385 | 17q22-q25.3 | i | 0 | 56562224 | 78865490 | 56567677 | 78865490 |
| H385 | 1p36.32/p36.33-p36.23 | 0 | i | 4002832 | 8934923 | 4002832 | 8951034 |
| H385 | 22q11.22 | e | 0 | 0 | 0 | 23017540 | 23223233 |
| H385 | 2p16.1-p14 | i | 0 | 61022699 | 68112118 | 61013955 | 68130509 |
| H385 | 2p25.3-p22.2 | 0 | i | 3796120 | 37880784 | 3796120 | 38053589 |
| H385 | 6q12 | 0 | i | 64310098 | 64557043 | 64312013 | 64556918 |
| H385 | 6q14.1-q25.2 | 0 | i | 79850349 | 1,53E+08 | 79780858 | 152657496 |
| H385 | 7q35 | e | 0 | 0 | 0 | 143246393 | 143543853 |
|  |  |  |  |  |  |  |  |
| i | *Identical* |  |  |  |  |  |  |
| e | *Explainable* |  |  |  |  |  |  |
| r | *Different* |  |  |  |  |  |  |
|  |  |  |  |  |  |  |  |
| (*) | This sample represents a gain identified by the Cyto2.7M array and a loss identified by the | | | | | | |
|  | SNP6.0 array at overlapping chromosomal location. | | | | |  |  |
